# Supplementary material for: Obligate autotrophy at the thermodynamic limit of life in a new acetogenic bacterium
Source: Front Microbiol. 2023 May 12;14:1185739. doi: 10.3389/fmicb.2023.1185739 (PMC10213532; doi:10.3389/fmicb.2023.1185739)
Supplement: Supplementary file 2 [file Data_Sheet_2.XLSX]

## Sheet: Islandviewer Results
GI number	Island start	Island end	Length	Method	Locus	Gene start	Gene end	Strand	Product	External Annotations
GI1	36056	52701	16645	Island Viewer 4	ACETAC_00185	36056	36358	-1	rubrerythrin
					ACETAC_00190	36823	38160	-1	ISNCY family transposase
					ACETAC_00200	38482	38925	1	nucleoside deaminase
					ACETAC_00220	39599	41488	1	HD domain-containing protein
					ACETAC_00225	41556	43160	1	DNA polymerase III subunit gamma/tau
					ACETAC_00230	43233	43568	1	YbaB/EbfC family nucleoid-associated protein
					ACETAC_00235	43581	44180	1	recombination protein RecR
					ACETAC_00240	44342	44605	1	DUF2508 family protein
					ACETAC_00245	44657	44929	1	pro-sigmaK processing inhibitor BofA family protein
					ACETAC_00250	45018	45266	1	DUF1657 domain-containing protein
					ACETAC_00280	51016	51753	1	SDR family oxidoreductase
					ACETAC_00285	52120	52701	1	4Fe-4S dicluster domain-containing protein
GI2	204033	227434	23401	Island Viewer 4	ACETAC_00960	204033	204836	-1	AAA family ATPase
					ACETAC_00965	204858	206096	-1	DDE-type integrase/transposase/recombinase
					ACETAC_00970	206327	206899	-1	hypothetical protein
					ACETAC_00975	207085	207276	1	type I-B CRISPR-associated protein Cas7/Csh2
					ACETAC_00980	207291	208001	1	type I-B CRISPR-associated protein Cas5
					ACETAC_00985	208015	210348	1	CRISPR-associated helicase Cas3'
					ACETAC_00990	214711	218133	1	S-layer homology domain-containing protein
					ACETAC_00995	218535	221411	1	S-layer homology domain-containing protein
					ACETAC_01000	222222	223337	1	iron ABC transporter substrate-binding protein
					ACETAC_01005	223396	224232	1	nitrogenase reductase
					ACETAC_01010	224406	225107	1	ABC transporter ATP-binding protein
					ACETAC_01015	225110	227434	1	ABC transporter permease
GI3	263507	335094	71587	Island Viewer 4	ACETAC_01170	263507	263812	1	septum formation initiator family protein
					ACETAC_01175	264180	265517	-1	ISNCY family transposase
					ACETAC_01180	265750	266172	1	RNA-binding protein S1
					ACETAC_01185	266218	267126	1	Ppx/GppA family phosphatase
					ACETAC_01190	267295	269012	-1	IS1634 family transposase
					ACETAC_01195	269330	270393	1	IS30 family transposase
					ACETAC_01200	270703	271506	-1	AAA family ATPase
					ACETAC_01205	271528	272766	-1	DDE-type integrase/transposase/recombinase
					ACETAC_01210	272997	273569	-1	hypothetical protein
					ACETAC_01215	274188	275525	1	ISNCY family transposase
					ACETAC_01235	276721	278304	-1	IS1182 family transposase
					ACETAC_01240	278862	279194	1	hypothetical protein
					ACETAC_01245	279583	279882	-1	transposase
					ACETAC_01250	280395	281621	1	peptide ABC transporter permease
					ACETAC_01255	281618	282283	1	ATP-binding cassette domain-containing protein
					ACETAC_01260	282287	282469	1	DUF3953 domain-containing protein
					ACETAC_01265	282594	284177	1	IS1182 family transposase
					ACETAC_01270	284887	285939	1	HD-GYP domain-containing protein
					ACETAC_01275	295272	295844	1	hypothetical protein
					ACETAC_01280	296075	297313	1	DDE-type integrase/transposase/recombinase
					ACETAC_01285	297335	298138	1	AAA family ATPase
					ACETAC_01290	299277	300668	1	hypothetical protein
					ACETAC_01295	300957	306728	1	RHS repeat protein
					ACETAC_01300	306917	308044	1	S-layer homology domain-containing protein
					ACETAC_01305	308225	308656	1	RDD family protein
					ACETAC_01310	308782	310233	1	TIGR02710 family CRISPR-associated protein
					ACETAC_01315	310266	311096	1	type III-B CRISPR module RAMP protein Cmr1
					ACETAC_01320	311096	313378	1	type III-B CRISPR-associated protein Cas10/Cmr2
					ACETAC_01325	313381	314475	1	type III-B CRISPR module-associated protein Cmr3
					ACETAC_01330	314472	315698	1	putative CRISPR-associated protein
					ACETAC_01335	315802	316755	1	type III-B CRISPR module RAMP protein Cmr4
					ACETAC_01340	316757	317362	1	type III-B CRISPR module-associated protein Cmr5
					ACETAC_01345	317419	318243	1	type III-B CRISPR module RAMP protein Cmr6
					ACETAC_01350	318316	318885	1	hypothetical protein
					ACETAC_01355	318936	319133	1	hypothetical protein
					ACETAC_01360	319912	320328	-1	AAA family ATPase
					ACETAC_01365	320687	321565	1	type II secretion system F family protein
					ACETAC_01370	321578	321997	1	hypothetical protein
					ACETAC_01375	322055	322474	1	type II secretion system F family protein
					ACETAC_01380	322471	323103	1	Tad domain-containing protein
					ACETAC_01385	323151	323339	1	hypothetical protein
					ACETAC_01390	323356	323511	1	hypothetical protein
					ACETAC_01395	323526	324002	1	prepilin peptidase
					ACETAC_01400	323999	326503	1	hypothetical protein
					ACETAC_01405	326510	326995	1	hypothetical protein
					ACETAC_01410	327069	327524	1	hypothetical protein
					ACETAC_01415	327597	328787	1	copper amine oxidase N-terminal domain-containing protein
					ACETAC_01420	328865	330685	1	hypothetical protein
					ACETAC_01425	330702	332150	1	hypothetical protein
					ACETAC_01430	332268	333833	1	AAA family ATPase
					ACETAC_01435	333852	334280	1	prepilin peptidase
					ACETAC_01440	334318	334575	1	septation regulator SpoVG
					ACETAC_01445	334576	335094	1	HD-GYP domain-containing protein
GI4	347349	368305	20956	Island Viewer 4	ACETAC_01525	347349	348305	1	NgoFVII family restriction endonuclease
					ACETAC_01530	348362	349924	1	restriction endonuclease
					ACETAC_01535	349938	350372	1	DNA mismatch endonuclease Vsr
					ACETAC_01540	350384	350605	1	DUF3006 domain-containing protein
					ACETAC_01545	350801	351679	1	IS30 family transposase
					ACETAC_01550	351860	352432	1	hypothetical protein
					ACETAC_01555	352663	353901	1	DDE-type integrase/transposase/recombinase
					ACETAC_01560	353923	354726	1	AAA family ATPase
					ACETAC_01565	355073	355255	1	IS30 family transposase
					ACETAC_01570	358066	360987	1	S-layer homology domain-containing protein
					ACETAC_01575	361404	363845	1	type I restriction-modification system subunit M
					ACETAC_01580	363838	365136	1	restriction endonuclease subunit S
					ACETAC_01585	365123	368305	1	type I restriction endonuclease subunit R
GI5	405273	418989	13716	Island Viewer 4	ACETAC_01780	404996	405283	1	type II toxin-antitoxin system Phd/YefM family antitoxin
					ACETAC_01785	405273	405581	1	type II toxin-antitoxin system RelE/ParE family toxin
					ACETAC_01790	406045	406410	1	lactococcin 972 family bacteriocin
					ACETAC_01795	406552	408771	1	DUF1430 domain-containing protein
					ACETAC_01800	408777	409418	1	ABC transporter ATP-binding protein
					ACETAC_01805	409790	410488	1	hypothetical protein
					ACETAC_01810	410608	410988	1	hypothetical protein
					ACETAC_01815	410985	411329	1	hypothetical protein
					ACETAC_01820	411741	413324	1	IS1182 family transposase
					ACETAC_01825	413654	415237	1	IS1182 family transposase
					ACETAC_01830	415425	415640	1	hypothetical protein
					ACETAC_01835	415674	416210	1	hypothetical protein
					ACETAC_01840	416565	416903	1	hypothetical protein
					ACETAC_01845	417043	417330	1	hypothetical protein
					ACETAC_01850	418156	418989	1	hypothetical protein
GI6	567719	587270	19551	Island Viewer 4	ACETAC_02455	567719	569302	1	IS1182 family transposase
					ACETAC_02460	569546	569968	1	hypothetical protein
					ACETAC_02465	570091	570365	1	mannose-1-phosphate guanylyltransferase
					ACETAC_02470	570698	571117	1	hypothetical protein
					ACETAC_02475	571152	571541	1	helix-turn-helix transcriptional regulator
					ACETAC_02480	571538	572008	1	preprotein translocase subunit SecB
					ACETAC_02485	572475	572570	1	polyphenol oxidase
					ACETAC_02490	572701	574152	1	transposase
					ACETAC_02495	574641	575714	1	plasmid pRiA4b ORF-3 family protein
					ACETAC_02500	575784	576041	1	type II toxin-antitoxin system prevent-host-death family antitoxin
					ACETAC_02505	576034	576294	1	Txe/YoeB family addiction module toxin
					ACETAC_02510	576536	578023	1	TIGR02677 family protein
					ACETAC_02515	578034	579167	1	TIGR02678 family protein
					ACETAC_02520	579232	583386	1	TIGR02680 family protein
					ACETAC_02525	583379	584662	1	TIGR02679 family protein
					ACETAC_02530	584677	585072	1	nucleotidyltransferase substrate binding protein
					ACETAC_02535	585075	585374	1	nucleotidyltransferase domain-containing protein
					ACETAC_02540	585626	585868	1	type II toxin-antitoxin system prevent-host-death family antitoxin
					ACETAC_02545	585852	586277	1	PIN domain-containing protein
					ACETAC_02550	586698	587270	1	TetR/AcrR family transcriptional regulator
GI7	876081	912254	36173	Island Viewer 4	ACETAC_04085	876081	876506	-1	transcriptional repressor
					ACETAC_04090	876960	877376	1	TM2 domain-containing protein
					ACETAC_04095	877652	878981	1	DUF1887 domain-containing protein
					ACETAC_04100	878978	880543	1	hypothetical protein
					ACETAC_04105	880540	882750	1	hypothetical protein
					ACETAC_04110	882743	884173	1	hypothetical protein
					ACETAC_04115	884175	884762	1	TIGR03984 family CRISPR-associated protein
					ACETAC_04120	884768	886771	1	TIGR03986 family CRISPR-associated RAMP protein
					ACETAC_04125	886797	887243	1	gamma-glutamylcyclotransferase
					ACETAC_04130	887460	888110	1	IS607 family transposase
					ACETAC_04135	888088	889784	1	transposase
					ACETAC_04140	890087	891052	1	slipin family protein
					ACETAC_04145	891605	892174	1	hypothetical protein
					ACETAC_04150	892134	892427	1	hypothetical protein
					ACETAC_04155	892420	892866	1	ATP-binding protein
					ACETAC_04160	892991	894574	1	IS1182 family transposase
					ACETAC_04165	894740	895102	1	ATP-binding protein
					ACETAC_04170	895234	896949	1	phosphoadenosine phosphosulfate reductase family protein
					ACETAC_04175	896967	897851	1	DUF4007 family protein
					ACETAC_04180	897879	901511	1	hypothetical protein
					ACETAC_04185	901524	902681	1	aminotransferase class V-fold PLP-dependent enzyme
					ACETAC_04190	902692	902832	1	hypothetical protein
					ACETAC_04195	902889	903464	1	S-layer homology domain-containing protein
					ACETAC_04200	903445	903687	1	hypothetical protein
					ACETAC_04205	903684	905879	1	DEAD/DEAH box helicase family protein
					ACETAC_04210	905869	906048	1	hypothetical protein
					ACETAC_04215	906039	908033	1	AAA family ATPase
					ACETAC_04220	908039	908560	1	hypothetical protein
					ACETAC_04225	908565	909665	1	sigma-70 family RNA polymerase sigma factor
					ACETAC_04230	910148	910822	1	hypothetical protein
					ACETAC_04235	911167	911623	-1	YaiI/YqxD family protein
					ACETAC_04240	911754	912254	1	metal-dependent transcriptional regulator
GI8	1100701	1107604	6903	Island Viewer 4	ACETAC_05155	1100701	1101201	1	sigma-70 family RNA polymerase sigma factor
					ACETAC_05160	1101204	1102379	1	DUF2275 domain-containing protein
					ACETAC_05165	1102384	1103286	1	ABC transporter ATP-binding protein
					ACETAC_05170	1103283	1104143	1	ABC transporter permease
					ACETAC_05175	1104153	1104557	-1	DUF1284 domain-containing protein
					ACETAC_05180	1104705	1105760	1	IS30 family transposase
					ACETAC_05185	1106206	1106916	1	30S ribosomal protein S2
					ACETAC_05190	1106990	1107604	1	translation elongation factor Ts
GI9	1190240	1203726	13486	Island Viewer 4	ACETAC_05590	1190240	1190494	1	RNA chaperone Hfq
					ACETAC_05595	1190564	1191358	1	pyrroline-5-carboxylate reductase
					ACETAC_05600	1191355	1191810	1	ribonuclease HI
					ACETAC_05605	1191904	1192521	-1	sporulation membrane protein YtaF
					ACETAC_05610	1192680	1193108	1	NfeD family protein
					ACETAC_05615	1193133	1194059	1	SPFH/Band 7/PHB domain protein
					ACETAC_05620	1194218	1195189	1	tyrosine recombinase XerC
					ACETAC_05625	1195244	1195861	1	transcriptional repressor LexA
					ACETAC_05630	1195964	1197178	-1	ABC transporter permease
					ACETAC_05635	1197188	1198105	-1	efflux RND transporter periplasmic adaptor subunit
					ACETAC_05640	1198124	1198822	-1	YIP1 family protein
					ACETAC_05645	1198839	1199573	-1	ABC transporter ATP-binding protein
					ACETAC_05650	1199661	1201301	-1	ABC transporter ATP-binding protein
					ACETAC_05655	1201334	1203004	-1	ABC transporter permease
					ACETAC_05660	1203001	1203726	-1	ABC transporter ATP-binding protein
GI10	1220992	1254967	33975	Island Viewer 4	ACETAC_05750	1220992	1221357	-1	hypothetical protein
					ACETAC_05755	1221469	1221690	-1	bacteriocin-type signal sequence
					ACETAC_05760	1222033	1222249	-1	peptidase C39
					ACETAC_05765	1223024	1223353	-1	hypothetical protein
					ACETAC_05770	1223578	1223825	-1	peptidase C39
					ACETAC_05775	1224001	1224393	-1	hypothetical protein
					ACETAC_05780	1224579	1224914	-1	CPBP family intramembrane metalloprotease
					ACETAC_05785	1225189	1225443	-1	hypothetical protein
					ACETAC_05790	1225522	1225800	-1	bacteriocin
					ACETAC_05795	1227015	1228316	-1	IS110 family transposase
					ACETAC_05800	1228527	1228967	-1	type II toxin-antitoxin system VapC family toxin
					ACETAC_05805	1228955	1229203	-1	hypothetical protein
					ACETAC_05810	1229506	1231218	-1	IS1634 family transposase
					ACETAC_05815	1231569	1231745	-1	hypothetical protein
					ACETAC_05820	1231831	1233153	-1	transposase
					ACETAC_05825	1233345	1233713	-1	hypothetical protein
					ACETAC_05830	1234093	1234272	-1	hypothetical protein
					ACETAC_05835	1234550	1234762	-1	peptidase C39
					ACETAC_05840	1234939	1235304	-1	hypothetical protein
					ACETAC_05845	1235420	1235641	-1	bacteriocin-type signal sequence
					ACETAC_05850	1236136	1236246	1	methionine gamma-lyase family protein
					ACETAC_05855	1236302	1237315	-1	IS110 family transposase
					ACETAC_05860	1237924	1238205	-1	hypothetical protein
					ACETAC_05865	1238477	1238917	-1	hypothetical protein
					ACETAC_05870	1239000	1239227	-1	hypothetical protein
					ACETAC_05875	1239261	1239413	-1	hypothetical protein
					ACETAC_05880	1239410	1239592	-1	hypothetical protein
					ACETAC_05885	1239937	1240101	-1	hypothetical protein
					ACETAC_05890	1240117	1240296	-1	hypothetical protein
					ACETAC_05895	1240511	1240831	-1	hypothetical protein
					ACETAC_05900	1240906	1241121	-1	hypothetical protein
					ACETAC_05905	1241642	1242214	1	hypothetical protein
					ACETAC_05910	1242445	1243683	1	DDE-type integrase/transposase/recombinase
					ACETAC_05915	1243705	1244508	1	AAA family ATPase
					ACETAC_05920	1244819	1245089	-1	hypothetical protein
					ACETAC_05925	1245264	1245656	-1	hypothetical protein
					ACETAC_05930	1245748	1245975	-1	hypothetical protein
					ACETAC_05935	1246258	1246464	-1	peptidase C39
					ACETAC_05940	1246883	1247377	-1	hypothetical protein
					ACETAC_05945	1247584	1248312	-1	SurA N-terminal domain-containing protein
					ACETAC_05950	1248379	1248900	-1	hypothetical protein
					ACETAC_05955	1249734	1250507	-1	CPBP family intramembrane metalloprotease
					ACETAC_05960	1250650	1250856	-1	hypothetical protein
					ACETAC_05965	1250887	1251111	-1	lactococcin G-beta/enterocin 1071B family bacteriocin
					ACETAC_05970	1251634	1251999	-1	hypothetical protein
					ACETAC_05975	1252295	1252495	-1	bacteriocin-type signal sequence
					ACETAC_05980	1252939	1253154	1	hypothetical protein
					ACETAC_05985	1253684	1254967	-1	FAD-dependent oxidoreductase
					ACETAC_05990	1254960	1255925	-1	sulfide/dihydroorotate dehydrogenase-like FAD/NAD-binding protein
GI11	1347062	1359900	12838		ACETAC_06510	1347062	1347799	-1	ATP-binding protein
					ACETAC_06515	1347796	1349325	-1	IS21 family transposase
					ACETAC_06520	1349472	1349789	1	hypothetical protein
					ACETAC_06525	1350086	1351675	1	IS1634 family transposase
					ACETAC_06530	1351807	1352733	1	UPF0236 family protein
					ACETAC_06535	1352930	1354513	-1	IS1182 family transposase
					ACETAC_06540	1354692	1355204	1	UPF0236 family protein
					ACETAC_06545	1355286	1355459	1	hypothetical protein
					ACETAC_06550	1355875	1357212	1	ISNCY family transposase
					ACETAC_06555	1357588	1358295	-1	type II toxin-antitoxin system PemK/MazF family toxin
					ACETAC_06560	1358593	1359900	-1	transposase
GI12	1502455	1519476	17021		ACETAC_07325	1502455	1502856	-1	sigma-70 family RNA polymerase sigma factor
					ACETAC_07330	1503235	1504137	1	IS21 family transposase
					ACETAC_07335	1504546	1505125	1	ATP-binding protein
					ACETAC_07340	1505604	1506965	-1	zinc-ribbon domain-containing protein
					ACETAC_07345	1506980	1507708	-1	zinc ribbon domain-containing protein
					ACETAC_07350	1507896	1508228	1	hypothetical protein
					ACETAC_07355	1508341	1508505	1	hypothetical protein
					ACETAC_07360	1508655	1509227	1	hypothetical protein
					ACETAC_07365	1509458	1510696	1	DDE-type integrase/transposase/recombinase
					ACETAC_07370	1510718	1511521	1	AAA family ATPase
					ACETAC_07375	1511910	1512578	-1	hypothetical protein
					ACETAC_07380	1512623	1512856	-1	hypothetical protein
					ACETAC_07385	1512856	1513137	-1	hypothetical protein
					ACETAC_07390	1513718	1514884	-1	RCC1 repeat- and reductase domain-containing protein
					ACETAC_07395	1514970	1515736	-1	transposase
					ACETAC_07400	1516353	1517378	-1	leucine-rich repeat domain-containing protein
					ACETAC_07405	1517614	1517823	1	hypothetical protein
					ACETAC_07410	1518014	1518469	1	IS200/IS605 family transposase
					ACETAC_07415	1518821	1519099	-1	hypothetical protein
					ACETAC_07420	1519132	1519476	-1	hypothetical protein
GI13	1974063	2018750	44687	Island Viewer 4	ACETAC_09610	1974063	1974245	-1	hypothetical protein
					ACETAC_09615	1974410	1975285	-1	sugar ABC transporter permease
					ACETAC_09620	1975350	1975646	-1	hypothetical protein
					ACETAC_09625	1975854	1977437	-1	IS1182 family transposase
					ACETAC_09630	1977564	1978589	-1	extracellular solute-binding protein
					ACETAC_09635	1978625	1979449	-1	carbohydrate ABC transporter permease
					ACETAC_09640	1979455	1980144	-1	glycerophosphodiester phosphodiesterase
					ACETAC_09645	1980160	1980882	-1	GntR family transcriptional regulator
					ACETAC_09650	1981214	1982167	-1	S-layer homology domain-containing protein
					ACETAC_09655	1982801	1984468	-1	hypothetical protein
					ACETAC_09660	1985057	1985344	1	ABC transporter permease
					ACETAC_09665	1985357	1987303	-1	PD40 domain-containing protein
					ACETAC_09670	1987306	1987794	-1	RNA polymerase sigma factor
					ACETAC_09675	1987873	1988010	-1	hypothetical protein
					ACETAC_09680	1988128	1988970	-1	sugar phosphate isomerase/epimerase
					ACETAC_09685	1989199	1990650	-1	transposase
					ACETAC_09690	1991133	1991302	-1	thiamine phosphate synthase
					ACETAC_09695	1991322	1992122	-1	hydroxyethylthiazole kinase
					ACETAC_09700	1992804	1994198	1	dipeptidase PepV
					ACETAC_09705	1994511	1994750	-1	DUF2281 domain-containing protein
					ACETAC_09710	1994995	1996359	-1	ISL3 family transposase
					ACETAC_09715	1996355	1996693	-1	transposase family protein
					ACETAC_09720	1996709	1996861	-1	hypothetical protein
					ACETAC_09725	1997149	1998864	1	IS1634 family transposase
					ACETAC_09770	2005278	2005670	-1	30S ribosomal protein S9
					ACETAC_09775	2006174	2007412	1	IS110 family transposase
					ACETAC_09780	2007560	2007988	-1	50S ribosomal protein L13
					ACETAC_09785	2008075	2008249	-1	hypothetical protein
					ACETAC_09790	2008363	2010078	1	IS1634 family transposase
					ACETAC_09795	2010298	2011635	1	ISNCY family transposase
					ACETAC_09800	2011976	2012722	-1	tRNA pseudouridine(38-40) synthase TruA
					ACETAC_09805	2012765	2013571	-1	energy-coupling factor transporter transmembrane protein EcfT
					ACETAC_09810	2013564	2014424	-1	energy-coupling factor transporter ATPase
					ACETAC_09815	2014409	2015239	-1	energy-coupling factor transporter ATPase
					ACETAC_09820	2015370	2015708	-1	50S ribosomal protein L17
					ACETAC_09825	2015724	2016647	-1	DNA-directed RNA polymerase subunit alpha
					ACETAC_09830	2016691	2017311	-1	30S ribosomal protein S4
					ACETAC_09835	2017326	2017718	-1	30S ribosomal protein S11
					ACETAC_09840	2017734	2018102	-1	30S ribosomal protein S13
					ACETAC_09845	2018114	2018227	-1	50S ribosomal protein L36
					ACETAC_09850	2018243	2018461	-1	translation initiation factor IF-1
					ACETAC_09855	2018478	2018750	-1	KOW domain-containing RNA-binding protein
